# Supplementary material
Source: Royal Society of Chemistry journal article supplement (doi:10.1039/d6ce00260a)
Supplement: d6ce00260a1.pdf [file d6ce00260a1.pdf]

## Supporting Information

### **Construction and fluorescence sensing performance of cucurbit[5]uril-based supramolecular assemblies incorporating amino-containing sulfonate ligand as structure inducer**

Yu-Fei Wu<sup>a</sup>, Xin-Rang Chen<sup>a</sup>, Jia-Yu Gu<sup>a</sup>, Xing-Yu Cheng<sup>a</sup>, Fei Li<sup>a</sup>, Shuai Xiao<sup>a</sup>, Lei Xu<sup>c</sup>,  
Kai Chen<sup>\*a,b</sup>

*Collaborative Innovation Center of Atmospheric Environment and Equipment Technology,  
Jiangsu Key Laboratory of Atmospheric Environment Monitoring and Pollution Control,  
School of Environmental Science and Engineering, Nanjing University of Information Science  
& Technology, Nanjing 210044 China*

#### **EXPERIMENTAL SECTION**

**Materials and General Methods.** All reagents and solvents were commercially purchased and used as received without further purification except that Q[5] was synthesized according to the previously reported methods.<sup>1</sup> FT-IR spectra were recorded in the range of 400-4000 cm<sup>-1</sup> on a Bruker FT-IR Spectrometer INVENIO using KBr pellets. Thermogravimetric analyses (TGA) were carried out on a Shimadzu DTG-60H microcomputer differential thermal balance under nitrogen with a heating rate of 10 °C min<sup>-1</sup>. Powder X-ray diffraction (PXRD) data were collected at room temperature on bulk samples with Cu K<sub>α</sub> radiation (1.5418 Å) on a Bruker D8 Advance X-ray diffractometer. The fluorescence spectra were measured on an F-280 fluorescence spectrophotometer at room temperature, using the

excitation and emission slit widths of 5 nm and photomultiplier tube voltage of 700 V.

**X-Ray Crystallography.** Single-crystal X-ray diffraction (SC-XRD) data of assemblies **1 - 4** were collected on a Bruker D8 Venture diffractometer with graphite-monochromated Mo K $\alpha$  radiation ( $\lambda = 0.71073 \text{ \AA}$ ) using  $\omega$ -scan technique. The integration of diffraction data and intensity corrections for the Lorentz and polarization effects were performed by using *SAINTE* program.<sup>2</sup> Semi-empirical absorption corrections were applied using *SADABS* program.<sup>3</sup> The structures were solved by direct methods with SHELXT-2018, expanded by subsequent Fourier-difference synthesis, and all the non-hydrogen atoms were refined anisotropically on  $F^2$  by the full-matrix least-squares technique using the SHELXL-2018 crystallographic software package.<sup>4,5</sup> All non-hydrogen atoms were refined anisotropically and all the hydrogen atoms except those of coordinated water molecules were introduced at the calculated positions. The free solvent molecules in the unit cell have been taken into account to SQUEEZE option of the PLATON program.<sup>6</sup> The final chemical formulas were obtained based on volume/count electron analysis and TG analysis. The reported refinements were of the guest-free structures obtained by the SQUEEZE routine and the results were attached to the CIF files. The squeezed water molecules are 22, 7, 8 and 12 for compounds **1 - 4**, respectively. The details of crystal parameters, data collection and refinements are listed in Table S1, and the selected bond lengths and angles are given in Table S2.

**Table S1.** Crystal Data and Structure Refinements for 1-4.

| Compound                          | 1                                                                                              | 2                                                                                             | 3                                                                                              | 4                                                                                               |
|-----------------------------------|------------------------------------------------------------------------------------------------|-----------------------------------------------------------------------------------------------|------------------------------------------------------------------------------------------------|-------------------------------------------------------------------------------------------------|
| chemical formula                  | C <sub>80</sub> H <sub>76</sub> N <sub>86</sub> Na <sub>4</sub> O <sub>56</sub> S <sub>4</sub> | C <sub>40</sub> H <sub>57</sub> K <sub>2</sub> N <sub>21</sub> O <sub>26</sub> S <sub>2</sub> | C <sub>40</sub> H <sub>57</sub> N <sub>21</sub> O <sub>27</sub> Rb <sub>2</sub> S <sub>2</sub> | C <sub>80</sub> H <sub>104</sub> Cs <sub>4</sub> N <sub>42</sub> O <sub>47</sub> S <sub>4</sub> |
| formula weight                    | 2786.02                                                                                        | 1390.27                                                                                       | 1499.07                                                                                        | 3065.81                                                                                         |
| $\lambda$ (Å)                     | 0.71073                                                                                        | 0.71073                                                                                       | 0.71073                                                                                        | 0.71073                                                                                         |
| $T$ (K)                           | 296(2)                                                                                         | 273(2)                                                                                        | 273(2)                                                                                         | 296(2)                                                                                          |
| crystal system                    | Triclinic                                                                                      | Orthorhombic                                                                                  | Orthorhombic                                                                                   | Monoclinic                                                                                      |
| space group                       | $P-1$                                                                                          | $P2_12_12_1$                                                                                  | $P2_12_12_1$                                                                                   | $Cc$                                                                                            |
| $a$ /Å                            | 17.4522(10)                                                                                    | 12.0698(10)                                                                                   | 12.428(4)                                                                                      | 14.7761(18)                                                                                     |
| $b$ /Å                            | 18.3402(10)                                                                                    | 15.9709(15)                                                                                   | 15.927(4)                                                                                      | 23.575(3)                                                                                       |
| $c$ /Å                            | 18.9286(12)                                                                                    | 29.752(3)                                                                                     | 29.711(9)                                                                                      | 17.677(3)                                                                                       |
| $\alpha$ (°)                      | 84.216(2)                                                                                      | 90                                                                                            | 90                                                                                             | 90                                                                                              |
| $\beta$ (°)                       | 71.577(2)                                                                                      | 90                                                                                            | 90                                                                                             | 110.898(4)                                                                                      |
| $\gamma$ (°)                      | 89.565(2)                                                                                      | 90                                                                                            | 90                                                                                             | 90                                                                                              |
| Volume /Å <sup>3</sup>            | 5716.9(6)                                                                                      | 5735.1(9)                                                                                     | 5881(3)                                                                                        | 5752.6(14)                                                                                      |
| $Z$                               | 2                                                                                              | 4                                                                                             | 4                                                                                              | 2                                                                                               |
| $D_c$ /g·cm <sup>-3</sup>         | 1.387                                                                                          | 1.464                                                                                         | 1.551                                                                                          | 1.644                                                                                           |
| $\mu$ /mm <sup>-1</sup>           | 0.192                                                                                          | 0.326                                                                                         | 1.824                                                                                          | 1.425                                                                                           |
| $F(000)$                          | 2460                                                                                           | 2608                                                                                          | 2784                                                                                           | 2832                                                                                            |
| reflections<br>collected          | 44727                                                                                          | 39718                                                                                         | 37374                                                                                          | 20121                                                                                           |
| Independent<br>reflections        | 20074                                                                                          | 10105                                                                                         | 10322                                                                                          | 7844                                                                                            |
| $R_{int}$                         | 0.0595                                                                                         | 0.0843                                                                                        | 0.0644                                                                                         | 0.0551                                                                                          |
| Data / restraints /<br>parameters | 20074 / 114 /<br>1515                                                                          | 10105 / 122 /<br>805                                                                          | 10322 / 110 /<br>824                                                                           | 7844 / 8 /<br>760                                                                               |
| GOF                               | 1.027                                                                                          | 1.023                                                                                         | 1.026                                                                                          | 1.077                                                                                           |
| $R_1$ ,                           | 0.0738,                                                                                        | 0.0637,                                                                                       | 0.0629,                                                                                        | 0.0607,                                                                                         |
| $wR_2 [I > 2\sigma(I)]^{a,b}$     | 0.2079                                                                                         | 0.1622                                                                                        | 0.1616                                                                                         | 0.1701                                                                                          |
| $R_1$ ,                           | 0.1201,                                                                                        | 0.1080,                                                                                       | 0.1084,                                                                                        | 0.0628,                                                                                         |
| $wR_2$ (all data)                 | 0.2398                                                                                         | 0.1915                                                                                        | 0.1862                                                                                         | 0.1729                                                                                          |
| CCDC.NO.                          | 2531079                                                                                        | 2531080                                                                                       | 2531081                                                                                        | 2531082                                                                                         |

<sup>a</sup> $R_1 = \Sigma||F_o| - |F_c||/\Sigma|F_o|$ . <sup>b</sup> $wR_2 = |\Sigma w(|F_o|^2 - |F_c|^2)|/\Sigma w(F_o)^2|^{1/2}$ , where  $w = 1/[\sigma^2(F_o^2) + (aP)^2 + bP]$ .  $P = (F_o^2 + 2F_c^2)/3$

**Table S2.** Selected Bond Lengths (Å) and Angles (°) for **1-4**.

| <b>1</b>          |            |                   |            |
|-------------------|------------|-------------------|------------|
| Na(1)-O(5)        | 2.371(4)   | Na(1)-O(13)       | 2.380(5)   |
| Na(1)-O(14)       | 2.410(4)   | Na(1)-O(1W)       | 2.423(4)   |
| Na(1)-O(4)        | 2.499(5)   | Na(1)-O(21)       | 2.560(4)   |
| Na(2)-O(11)       | 2.341(4)   | Na(2)-O(1)        | 2.361(4)   |
| Na(2)-O(1W)       | 2.407(4)   | Na(2)-O(12)       | 2.479(5)   |
| Na(2)-O(27)       | 2.506(4)   | Na(2)-O(2)        | 2.520(5)   |
| Na(3)-O(18)       | 2.721(5)   | Na(3)-O(19)       | 2.806(4)   |
| Na(3)-O(20)       | 2.806(4)   | Na(3)-O(16)       | 2.854(4)   |
| Na(3)-O(17)       | 2.872(5)   | Na(4)-O(2W)       | 2.476(9)   |
| Na(4)-O(6)        | 2.613(5)   | Na(4)-O(9)        | 2.630(5)   |
| Na(4)-O(7)        | 2.665(5)   | Na(4)-O(10)       | 2.721(5)   |
| Na(4)-O(8)        | 2.822(5)   |                   |            |
| O(5)-Na(1)-O(13)  | 108.91(16) | O(5)-Na(1)-O(14)  | 169.86(18) |
| O(13)-Na(1)-O(14) | 80.57(15)  | O(5)-Na(1)-O(1W)  | 89.55(15)  |
| O(13)-Na(1)-O(1W) | 101.01(15) | O(14)-Na(1)-O(1W) | 84.96(15)  |
| O(5)-Na(1)-O(4)   | 78.71(15)  | O(13)-Na(1)-O(4)  | 171.59(17) |
| O(14)-Na(1)-O(4)  | 92.08(15)  | O(1W)-Na(1)-O(4)  | 82.27(15)  |
| O(5)-Na(1)-O(21)  | 93.85(14)  | O(13)-Na(1)-O(21) | 83.94(14)  |
| O(14)-Na(1)-O(21) | 90.70(14)  | O(1W)-Na(1)-O(21) | 172.76(16) |
| O(4)-Na(1)-O(21)  | 92.12(14)  | O(11)-Na(2)-O(1)  | 169.42(17) |
| O(11)-Na(2)-O(1W) | 89.02(15)  | O(1)-Na(2)-O(1W)  | 97.35(15)  |
| O(11)-Na(2)-O(12) | 79.22(15)  | O(1)-Na(2)-O(12)  | 108.34(15) |
| O(1W)-Na(2)-O(12) | 95.96(16)  | O(11)-Na(2)-O(27) | 91.55(14)  |
| O(1)-Na(2)-O(27)  | 82.14(14)  | O(1W)-Na(2)-O(27) | 179.29(16) |
| O(12)-Na(2)-O(27) | 83.74(14)  | O(11)-Na(2)-O(2)  | 94.69(15)  |
| O(1)-Na(2)-O(2)   | 77.35(14)  | O(1W)-Na(2)-O(2)  | 86.52(15)  |
| O(12)-Na(2)-O(2)  | 173.36(15) | O(27)-Na(2)-O(2)  | 93.85(14)  |
| O(18)-Na(3)-O(19) | 70.39(12)  | O(18)-Na(3)-O(20) | 134.71(13) |
| O(19)-Na(3)-O(20) | 70.33(12)  | O(18)-Na(3)-O(16) | 131.87(14) |
| O(19)-Na(3)-O(16) | 134.23(12) | O(20)-Na(3)-O(16) | 68.53(12)  |
| O(18)-Na(3)-O(17) | 70.01(12)  | O(19)-Na(3)-O(17) | 135.64(14) |
| O(20)-Na(3)-O(17) | 130.95(14) | O(16)-Na(3)-O(17) | 66.76(12)  |
| O(2W)-Na(4)-O(6)  | 81.48(19)  | O(2W)-Na(4)-O(9)  | 119.95(19) |
| O(6)-Na(4)-O(9)   | 138.70(16) | O(2W)-Na(4)-O(7)  | 89.02(19)  |
| O(6)-Na(4)-O(7)   | 72.62(15)  | O(9)-Na(4)-O(7)   | 136.05(16) |
| O(2W)-Na(4)-O(10) | 97.0(2)    | O(6)-Na(4)-O(10)  | 70.94(14)  |
| O(9)-Na(4)-O(10)  | 71.61(14)  | O(7)-Na(4)-O(10)  | 141.66(16) |

|                  |            |                 |            |
|------------------|------------|-----------------|------------|
| O(2W)-Na(4)-O(8) | 110.1(2)   | O(6)-Na(4)-O(8) | 140.68(16) |
| O(9)-Na(4)-O(8)  | 68.97(13)  | O(7)-Na(4)-O(8) | 70.24(14)  |
| O(10)-Na(4)-O(8) | 139.56(15) |                 |            |

---

**2**

---

|                    |            |                    |            |
|--------------------|------------|--------------------|------------|
| K(1)-O(1)          | 2.745(6)   | K(1)-O(2W)         | 2.784(10)  |
| K(1)-O(4)          | 2.787(6)   | K(1)-O(5)          | 2.792(6)   |
| K(1)-O(2)          | 2.859(6)   | K(1)-O(1W)         | 2.860(9)   |
| K(1)-O(3)          | 2.930(7)   | K(2)-O(3W)         | 2.698(8)   |
| K(2)-O(10)         | 2.726(6)   | K(2)-O(9)          | 2.803(6)   |
| K(2)-O(6)          | 2.813(7)   | K(2)-O(8)          | 2.831(7)   |
| K(2)-O(7)          | 2.847(7)   | K(2)-O(1W)#2       | 3.422(11)  |
| O(1)-K(1)-O(2W)    | 131.1(3)   | O(1)-K(1)-O(4)     | 127.70(19) |
| O(2W)-K(1)-O(4)    | 74.2(3)    | O(1)-K(1)-O(5)     | 67.88(17)  |
| O(2W)-K(1)-O(5)    | 89.8(3)    | O(4)-K(1)-O(5)     | 67.65(19)  |
| O(1)-K(1)-O(2)     | 70.00(16)  | O(2W)-K(1)-O(2)    | 139.8(3)   |
| O(4)-K(1)-O(2)     | 123.86(19) | O(5)-K(1)-O(2)     | 129.53(17) |
| O(1)-K(1)-O(1W)    | 74.9(3)    | O(2W)-K(1)-O(1W)   | 68.6(4)    |
| O(4)-K(1)-O(1W)    | 141.8(3)   | O(5)-K(1)-O(1W)    | 103.3(3)   |
| O(2)-K(1)-O(1W)    | 91.2(3)    | O(1)-K(1)-O(3)     | 127.27(17) |
| O(2W)-K(1)-O(3)    | 101.0(3)   | O(4)-K(1)-O(3)     | 67.16(18)  |
| O(5)-K(1)-O(3)     | 128.20(18) | O(2)-K(1)-O(3)     | 63.67(16)  |
| O(1W)-K(1)-O(3)    | 127.9(3)   | O(3W)-K(2)-O(10)   | 89.4(2)    |
| O(3W)-K(2)-O(9)    | 108.7(2)   | O(10)-K(2)-O(9)    | 70.03(18)  |
| O(3W)-K(2)-O(6)    | 95.0(3)    | O(10)-K(2)-O(6)    | 69.33(18)  |
| O(9)-K(2)-O(6)     | 132.21(19) | O(3W)-K(2)-O(8)    | 126.7(3)   |
| O(10)-K(2)-O(8)    | 129.93(19) | O(9)-K(2)-O(8)     | 66.19(18)  |
| O(6)-K(2)-O(8)     | 129.0(2)   | O(3W)-K(2)-O(7)    | 116.9(2)   |
| O(10)-K(2)-O(7)    | 129.63(19) | O(9)-K(2)-O(7)     | 128.8(2)   |
| O(6)-K(2)-O(7)     | 66.46(19)  | O(8)-K(2)-O(7)     | 68.50(19)  |
| O(3W)-K(2)-O(1W)#2 | 74.7(3)    | O(10)-K(2)-O(1W)#2 | 116.9(2)   |
| O(9)-K(2)-O(1W)#2  | 59.5(2)    | O(6)-K(2)-O(1W)#2  | 167.3(2)   |
| O(8)-K(2)-O(1W)#2  | 56.8(2)    | O(7)-K(2)-O(1W)#2  | 111.4(3)   |

---

**3**

---

|             |           |             |           |
|-------------|-----------|-------------|-----------|
| Rb(1)-O(4)  | 2.867(7)  | Rb(1)-O(3W) | 2.902(10) |
| Rb(1)-O(3)  | 2.908(8)  | Rb(1)-O(5)  | 2.909(7)  |
| Rb(1)-O(2)  | 2.918(7)  | Rb(1)-O(1)  | 2.957(7)  |
| Rb(1)-O(4W) | 3.387(11) | Rb(1)-O(5W) | 3.54(3)   |

|                      |            |                      |            |
|----------------------|------------|----------------------|------------|
| Rb(2)-O(10)#1        | 2.863(7)   | Rb(2)-O(7)#1         | 2.873(7)   |
| Rb(2)-O(6)#1         | 2.911(7)   | Rb(2)-O(9)#1         | 2.957(7)   |
| Rb(2)-O(2W)          | 2.979(14)  | Rb(2)-O(8)#1         | 2.982(7)   |
| Rb(2)-O(4W)          | 2.992(11)  | Rb(2)-O(3W)          | 3.494(11)  |
| O(4)-Rb(1)-O(3W)     | 89.6(2)    | O(4)-Rb(1)-O(3)      | 67.4(2)    |
| O(3W)-Rb(1)-O(3)     | 97.0(3)    | O(4)-Rb(1)-O(5)      | 67.99(19)  |
| O(3W)-Rb(1)-O(5)     | 110.4(3)   | O(3)-Rb(1)-O(5)      | 126.6(2)   |
| O(4)-Rb(1)-O(2)      | 124.9(2)   | O(3W)-Rb(1)-O(2)     | 123.1(3)   |
| O(3)-Rb(1)-O(2)      | 65.7(2)    | O(5)-Rb(1)-O(2)      | 123.5(2)   |
| O(4)-Rb(1)-O(1)      | 124.59(19) | O(3W)-Rb(1)-O(1)     | 132.2(3)   |
| O(3)-Rb(1)-O(1)      | 125.0(2)   | O(5)-Rb(1)-O(1)      | 64.28(19)  |
| O(2)-Rb(1)-O(1)      | 67.0(2)    | O(4)-Rb(1)-O(4W)     | 116.3(3)   |
| O(3W)-Rb(1)-O(4W)    | 79.3(3)    | O(3)-Rb(1)-O(4W)     | 174.6(2)   |
| O(5)-Rb(1)-O(4W)     | 58.7(2)    | O(2)-Rb(1)-O(4W)     | 112.9(3)   |
| O(1)-Rb(1)-O(4W)     | 56.9(3)    | O(4)-Rb(1)-O(5W)     | 102.8(5)   |
| O(3W)-Rb(1)-O(5W)    | 60.4(5)    | O(3)-Rb(1)-O(5W)     | 51.6(6)    |
| O(5)-Rb(1)-O(5W)     | 167.8(4)   | O(2)-Rb(1)-O(5W)     | 68.0(5)    |
| O(1)-Rb(1)-O(5W)     | 127.5(5)   | O(4W)-Rb(1)-O(5W)    | 123.0(6)   |
| O(10)#1-Rb(2)-O(7)#1 | 123.3(2)   | O(10)#1-Rb(2)-O(6)#1 | 66.42(18)  |
| O(7)#1-Rb(2)-O(6)#1  | 66.3(2)    | O(10)#1-Rb(2)-O(9)#1 | 68.26(17)  |
| O(7)#1-Rb(2)-O(9)#1  | 120.17(19) | O(6)#1-Rb(2)-O(9)#1  | 125.17(18) |
| O(10)#1-Rb(2)-O(2W)  | 135.4(4)   | O(7)#1-Rb(2)-O(2W)   | 76.6(4)    |
| O(6)#1-Rb(2)-O(2W)   | 93.8(4)    | O(9)#1-Rb(2)-O(2W)   | 140.7(4)   |
| O(10)#1-Rb(2)-O(8)#1 | 122.47(18) | O(7)#1-Rb(2)-O(8)#1  | 66.08(19)  |
| O(6)#1-Rb(2)-O(8)#1  | 124.15(19) | O(9)#1-Rb(2)-O(8)#1  | 62.09(18)  |
| O(2W)-Rb(2)-O(8)#1   | 101.9(4)   | O(10)#1-Rb(2)-O(4W)  | 79.2(3)    |
| O(7)#1-Rb(2)-O(4W)   | 140.3(3)   | O(6)#1-Rb(2)-O(4W)   | 102.3(3)   |
| O(9)#1-Rb(2)-O(4W)   | 97.9(3)    | O(2W)-Rb(2)-O(4W)    | 65.9(4)    |
| O(8)#1-Rb(2)-O(4W)   | 133.1(3)   | O(10)#1-Rb(2)-O(3W)  | 110.1(2)   |
| O(7)#1-Rb(2)-O(3W)   | 116.8(3)   | O(6)#1-Rb(2)-O(3W)   | 176.5(2)   |
| O(9)#1-Rb(2)-O(3W)   | 52.28(19)  | O(2W)-Rb(2)-O(3W)    | 88.5(4)    |
| O(8)#1-Rb(2)-O(3W)   | 57.6(2)    | O(4W)-Rb(2)-O(3W)    | 76.4(3)    |

---

4

---

|             |           |             |           |
|-------------|-----------|-------------|-----------|
| Cs(1)-O(2)  | 2.943(12) | Cs(1)-O(3)  | 3.022(13) |
| Cs(1)-O(4)  | 3.055(11) | Cs(1)-O(1)  | 3.110(14) |
| Cs(1)-O(5)  | 3.204(13) | Cs(1)-O(1W) | 3.253(17) |
| Cs(1)-O(15) | 3.409(14) | Cs(2)-O(2W) | 2.11(4)   |
| Cs(2)-O(6)  | 2.930(14) | Cs(2)-O(8)  | 2.956(13) |

|                     |           |                     |           |
|---------------------|-----------|---------------------|-----------|
| Cs(2)-O(10)         | 2.991(13) | Cs(2)-O(9)          | 3.012(13) |
| Cs(2)-O(7)          | 3.022(12) | Cs(2)-O(1W)#1       | 3.401(17) |
| O(2)-Cs(1)-O(3)     | 62.5(3)   | O(2)-Cs(1)-O(4)     | 115.1(3)  |
| O(3)-Cs(1)-O(4)     | 65.3(3)   | O(2)-Cs(1)-O(1)     | 63.0(3)   |
| O(3)-Cs(1)-O(1)     | 116.1(3)  | O(4)-Cs(1)-O(1)     | 113.7(3)  |
| O(2)-Cs(1)-O(5)     | 115.1(3)  | O(3)-Cs(1)-O(5)     | 116.2(3)  |
| O(4)-Cs(1)-O(5)     | 60.6(3)   | O(1)-Cs(1)-O(5)     | 63.4(3)   |
| O(2)-Cs(1)-O(1W)    | 122.3(4)  | O(3)-Cs(1)-O(1W)    | 155.4(3)  |
| O(4)-Cs(1)-O(1W)    | 121.4(4)  | O(1)-Cs(1)-O(1W)    | 84.2(4)   |
| O(5)-Cs(1)-O(1W)    | 84.7(3)   | O(2)-Cs(1)-O(15)    | 82.9(3)   |
| O(3)-Cs(1)-O(15)    | 71.4(3)   | O(4)-Cs(1)-O(15)    | 113.6(3)  |
| O(1)-Cs(1)-O(15)    | 129.9(3)  | O(5)-Cs(1)-O(15)    | 162.0(3)  |
| O(1W)-Cs(1)-O(15)   | 84.9(4)   | O(2W)-Cs(2)-O(6)    | 89.2(13)  |
| O(2W)-Cs(2)-O(8)    | 142.5(13) | O(6)-Cs(2)-O(8)     | 117.8(3)  |
| O(2W)-Cs(2)-O(10)   | 96.0(13)  | O(6)-Cs(2)-O(10)    | 66.0(4)   |
| O(8)-Cs(2)-O(10)    | 118.0(4)  | O(2W)-Cs(2)-O(9)    | 125.0(12) |
| O(6)-Cs(2)-O(9)     | 118.0(3)  | O(8)-Cs(2)-O(9)     | 67.1(3)   |
| O(10)-Cs(2)-O(9)    | 60.9(4)   | O(2W)-Cs(2)-O(7)    | 112.8(12) |
| O(6)-Cs(2)-O(7)     | 64.1(3)   | O(8)-Cs(2)-O(7)     | 64.3(3)   |
| O(10)-Cs(2)-O(7)    | 120.8(3)  | O(9)-Cs(2)-O(7)     | 122.0(3)  |
| O(2W)-Cs(2)-O(1W)#1 | 59.2(12)  | O(6)-Cs(2)-O(1W)#1  | 92.2(4)   |
| O(8)-Cs(2)-O(1W)#1  | 92.2(4)   | O(10)-Cs(2)-O(1W)#1 | 148.2(4)  |
| O(9)-Cs(2)-O(1W)#1  | 148.7(4)  | O(7)-Cs(2)-O(1W)#1  | 61.6(3)   |

<sup>a</sup> Symmetry transformations used to generate equivalent atoms: #1  $x+1, y, z$ ; #2  $x-1, y, z$  for **2**.

#1  $x-1, y, z$ ; #2  $x+1, y, z$  for **3**. #1  $x-1/2, y-1/2, z$ ; #2  $x+1/2, y+1/2, z$  for **4**.

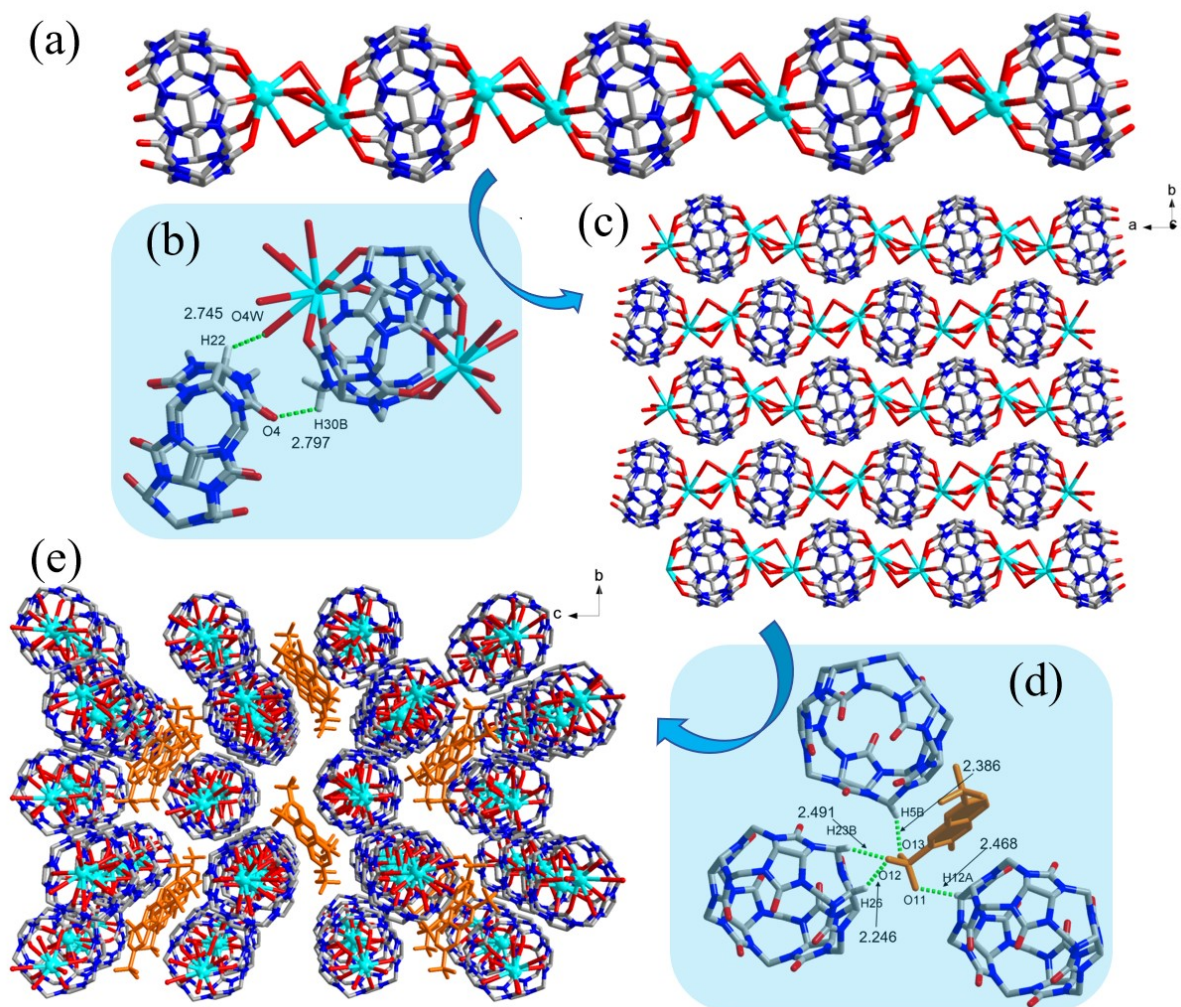

**Figure S1.** The structure of the 1D Q[5]-Rb<sup>+</sup> coordination chains (a), 2D Q[5]-K<sup>+</sup> supramolecular layers (c) and 3D Q[5]-K<sup>+</sup>-ADNS<sup>2-</sup> framework (e). The hydrogen bonds between Q[5]-Rb<sup>+</sup> chains (b) or Q[5]-K<sup>+</sup> chains and ADNS<sup>2-</sup> anions (d).

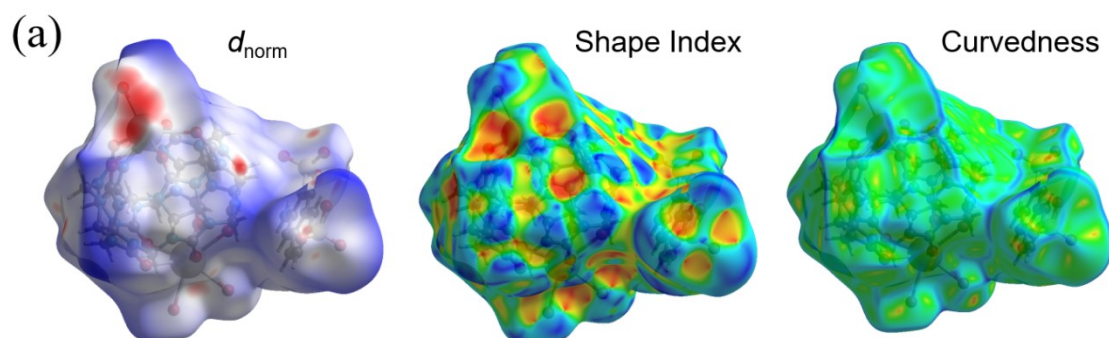

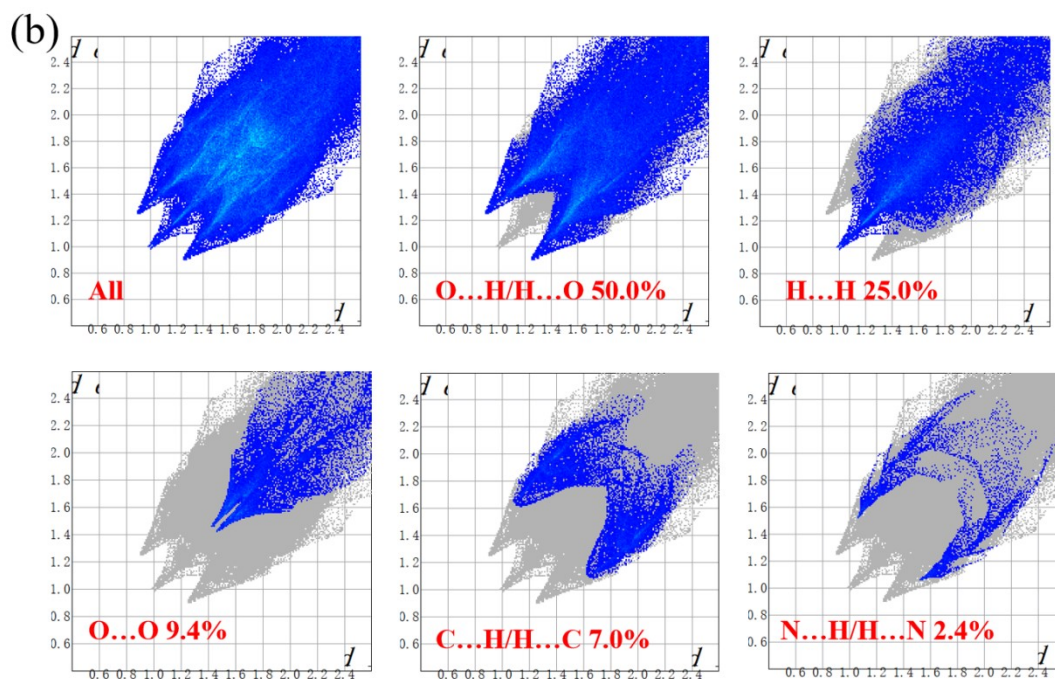

**Figure S2.** (a) Hirshfeld surfaces of assembly **2** mapped over  $d_{\text{norm}}$  (left), shape index (middle), and curvedness (right). (b) Fingerprint plot: Resolved into H...H, H...O/O...H, H...C/C...H, and O...O contacts contributed to the total Hirshfeld Surface area of the assembly **2**.

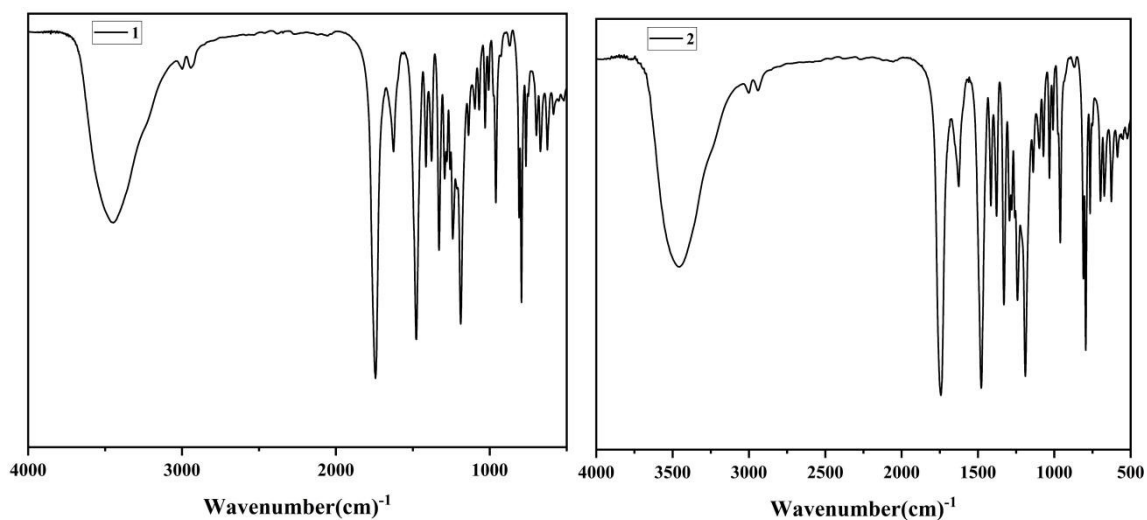

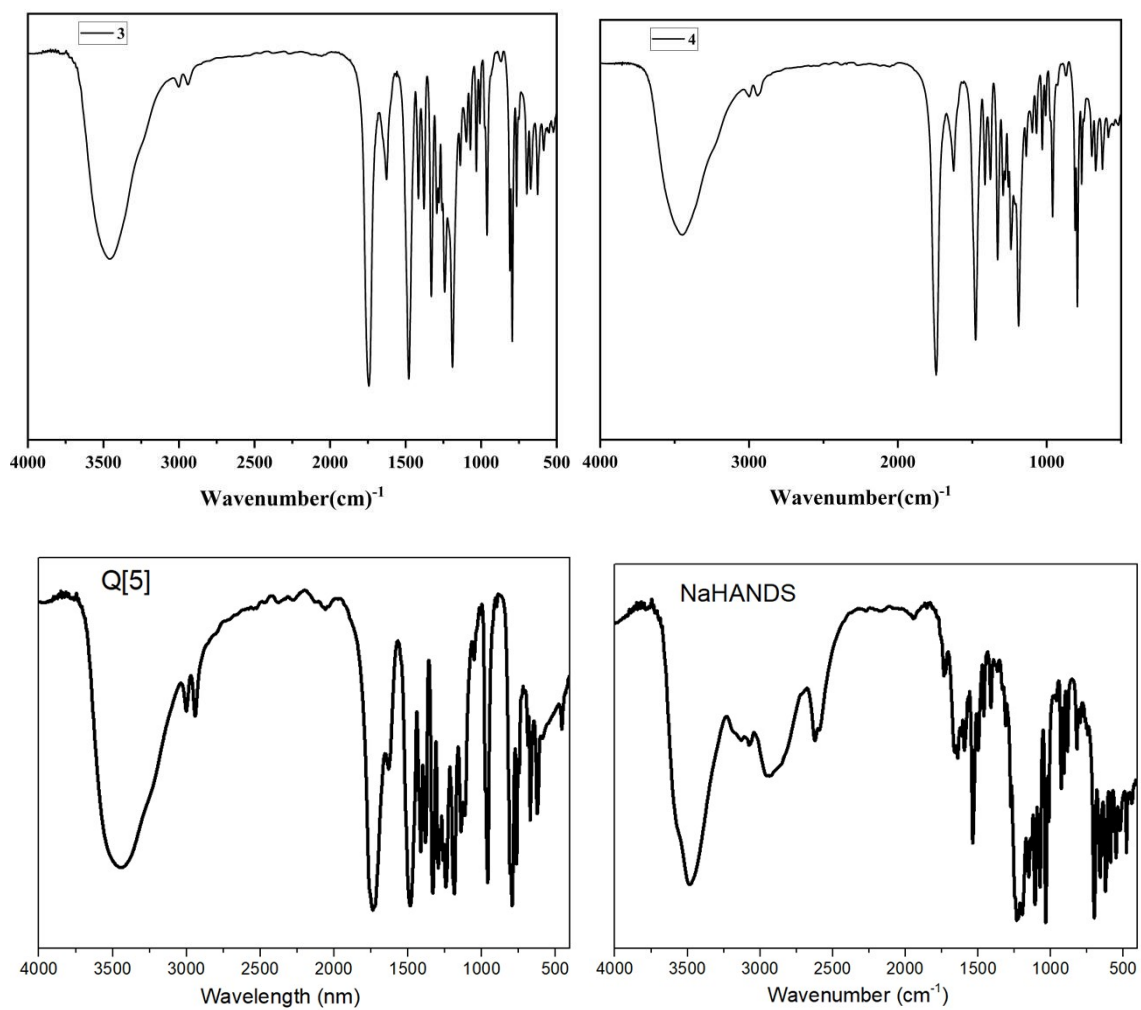

**Figure S3.** FT-IR spectra of assemblies **1-4**, Q[5] and ligand NaHANDS.

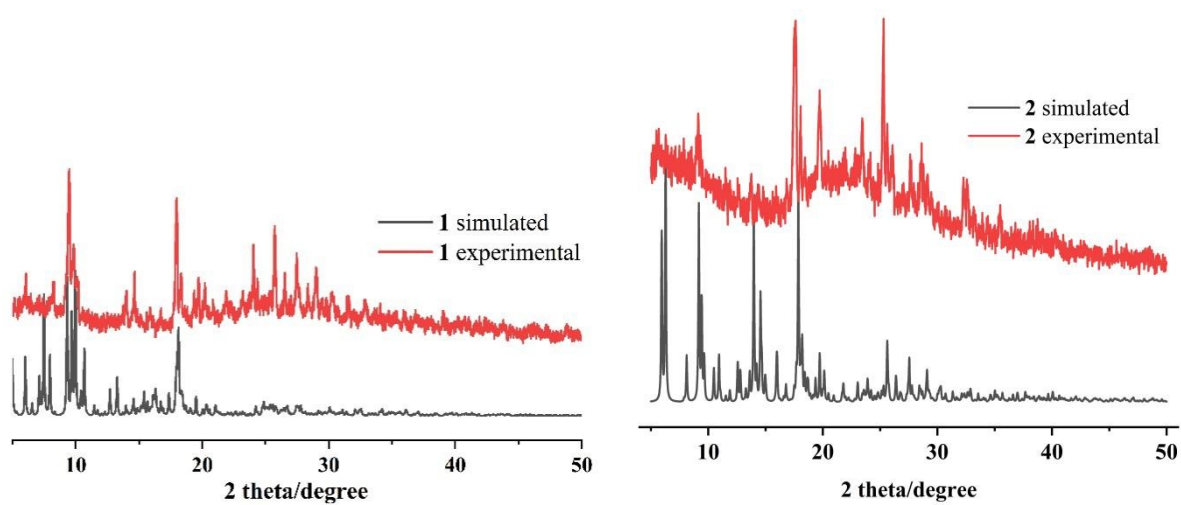

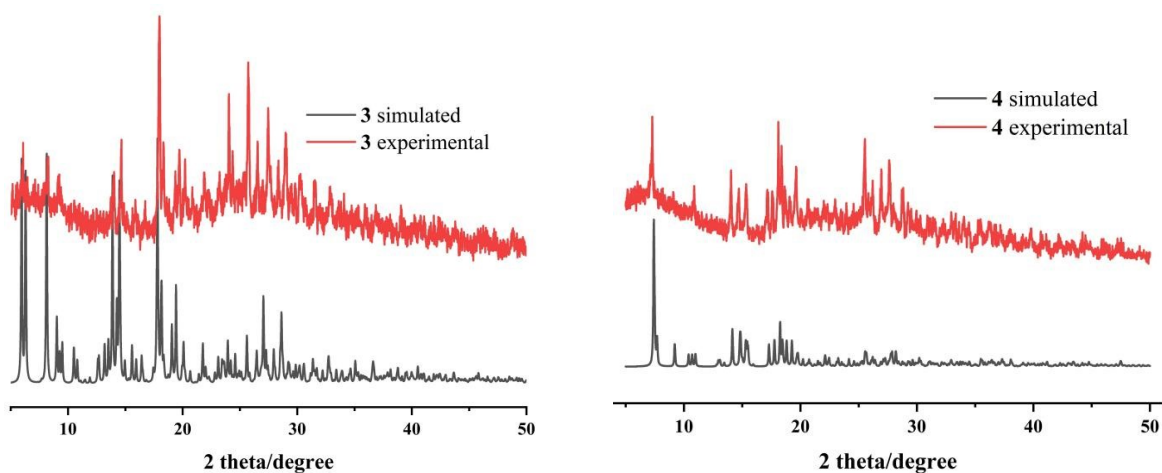

**Figure S4.** PXRD patterns of assemblies 1-4.

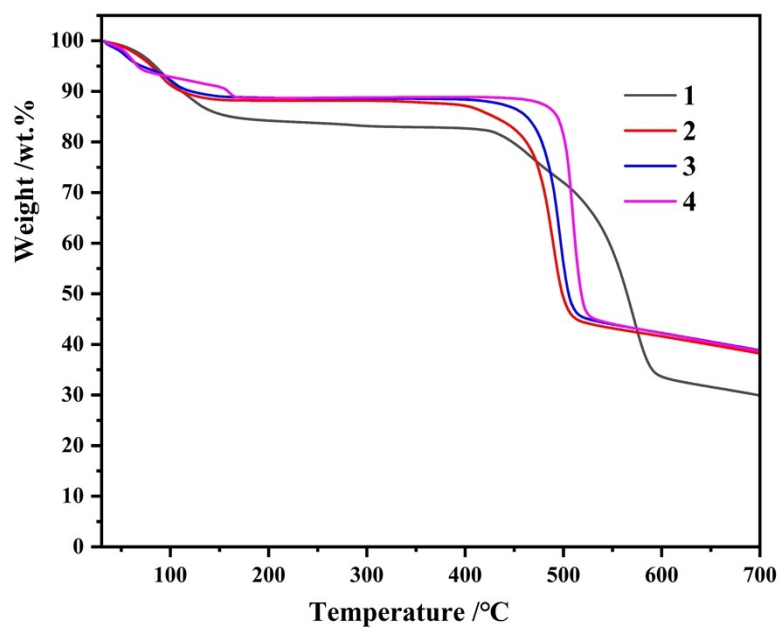

**Figure S5.** TG of assemblies 1-4.

**Table S3.** Comparison on sensing performance of some previously reported sensors for CAP.

| Sensor                     | Response model | LOD ( $\mu\text{M}$ ) | $K_{sv}$ ( $\text{M}^{-1}$ ) | References |
|----------------------------|----------------|-----------------------|------------------------------|------------|
| Assembly 1                 | Turn-off       | 6.12                  | $1.418 \times 10^4$          | This Work  |
| MMIP-assisted biosensor    | Turn-on        | 0.53                  | $7.629 \times 10^3$          | 7          |
| N,P-CDs                    | Turn-off       | 0.36                  | $1.1 \times 10^4$            | 8          |
| DNA aptamers               | Turn-off       | 14                    | -                            | 9          |
| Eu-MOF                     | Turn-off       | 3.16                  | $8 \times 10^3$              | 10         |
| triangular gold nanoplates | colorimetric   | 5                     | -                            | 11         |
| Zn/Co-MOF                  | Turn-off       | 33.4                  | $1.06 \times 10^4$           | 12         |
| Zn/Ni-MOF                  | Turn-off       | 44.0                  | $6.21 \times 10^3$           |            |

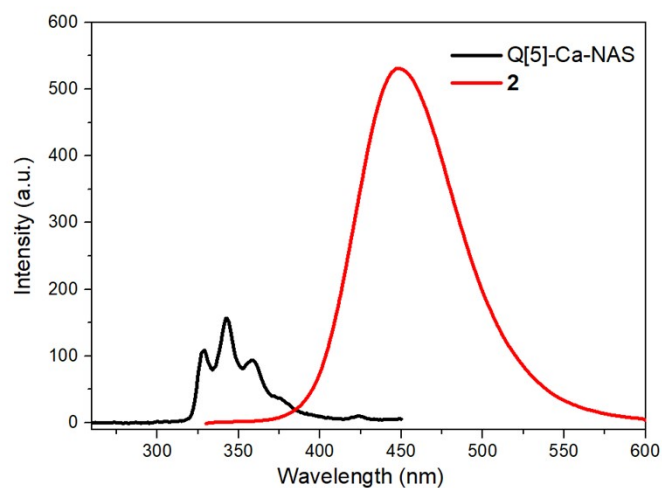

**Figure S6.** Fluorescence emission bands of assembly **2** and Q[5]-Ca-NAS.

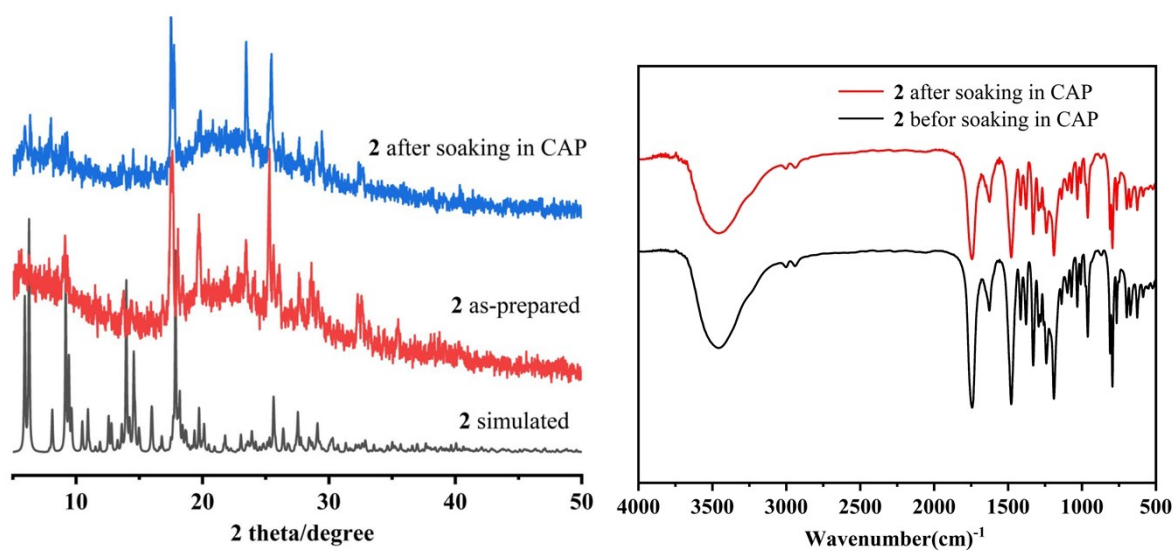

**Figure S7.** PXRD patterns (a) and FT-IR spectra (b) of assembly **2** before and after soaking in the solution of CAP.

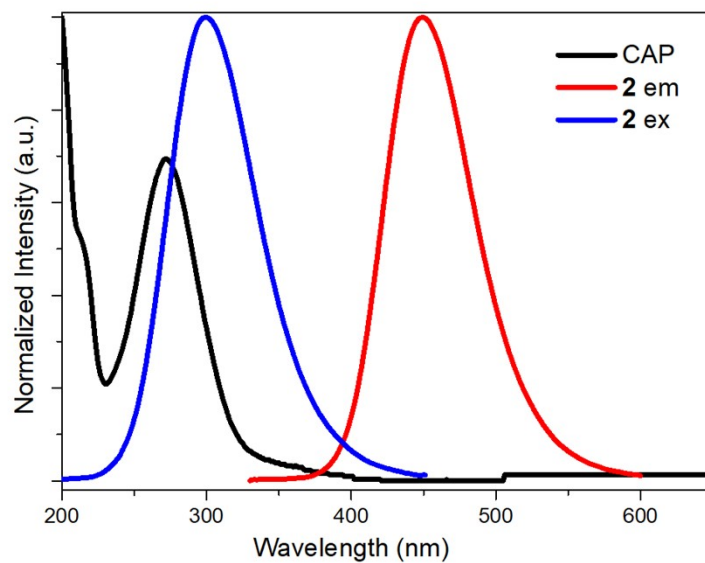

**Figure S8.** UV-vis absorption band of CAP, fluorescence excitation and emission bands of assembly **2**.

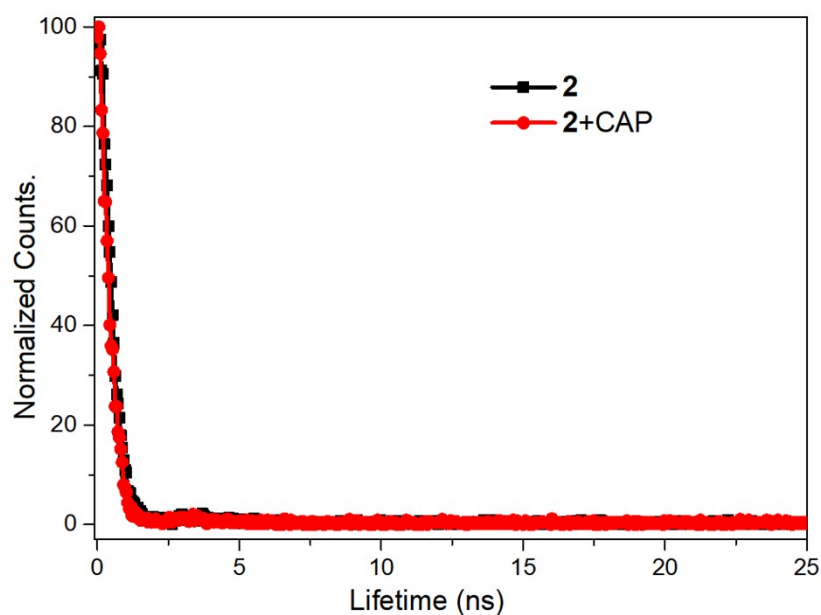

**Figure S9.** Fluorescence lifetimes of assembly **2** in the absence and presence of CAP.

## Reference

(1) J. Kim, I. S. Jung, S. Y. Kim, E. Lee, J. K. Kang, S. Sakamoto, K. Yamaguchi, K. Kim, New Cucurbituril Homologues: Syntheses, Isolation, Characterization, and X-ray Crystal Structures of Cucurbit[n]uril ( $n = 5, 7,$  and  $8$ ), *J. Am. Chem. Soc.* **2000**, *122*, 540-541.

- (2) SAINT, *Program for Data Extraction and Reduction*, Bruker AXS, Inc, Madison, WI, **2001**.
- (3) Sheldrick, G. M. *SADABS, Program for Empirical Adsorption Correction of Area Detector Data*, University of Göttingen, Germany, **2003**.
- (4) Sheldrick, G. M. *SHELXT-2014, Program for the crystal Structure Solution*, University of Göttingen, Germany, **2018**.
- (5) Sheldrick, G. M. *SHELXL-2018, Program for the crystal Structure refinement*, University of Göttingen, Germany, **2018**.
- (6) (a) Van, d. S. P.; Spek, A. L. BYPASS: an effective method for the refinement of crystal structures containing disordered solvent regions. *Acta Crystallogr., Sect. A: Found. Crystallogr.* **1990**, *46*, 194-201. (b) A. L. Spek, PLATON, A Multipurpose Crystallographic Tool, Utrecht University, Utrecht, The Netherlands, 2005, or Spek, A. L. *J. Appl. Cryst.* **2003**, *36*, 7.
- (7) Long, Z.; Guo, J. J.; Liu, X. F.; Long, C. H.; Zhang, P.; Feng, B.; Qing, T. P. Magnetic molecularly imprinted polymer-assisted target enrichment for the fluorescence detection of chloramphenicol in water. *Analyst*, **2026**, *151*, 1763-1773.
- (8) Zuo, P. L.; Chen, Z. G.; Yu, F. L.; Zhang, J. Y.; Zuo, W.; Gao, Y. L.; Liu, Q. Y. An easy synthesis of nitrogen and phosphorus codoped carbon dots as a probe for chloramphenicol. *RSC Adv.* **2020**, *10*, 32919-32926.
- (9) Zhao, Y. C.; Li, A. Z.; Liu, J. W. Capture-SELEX for Chloramphenicol Binding Aptamers for Labeled and Label-Free Fluorescence Sensing. *Environ. Health* **2023**, *1*, 102-109.
- (10) Yue, X. Y.; Wu, C. Y.; Zhou, Z. J.; Fu, L.; Bai, Y. H. Fluorescent Sensing of Ciprofloxacin and Chloramphenicol in Milk Samples via Inner Filter Effect and Photoinduced Electron Transfer Based on Nanosized Rod-Shaped Eu-MOF. *Foods* **2022**, *11*, 3138.
- (11) Chang, C.-C.; Wang, G.; Takarada, T.; Maeda, M. IodineMediated Etching of Triangular

Gold Nanoplates for Colorimetric Sensing of Copper Ion and Aptasensing of Chloramphenicol. *ACS Appl. Mater. Interfaces* **2017**, *9*, 34518-34525.

(12) Shi, J. L.; Yan, B.; Wang, G. J.; Wang, B. Q.; Yang, H. Y.; Fu, Y. L.; Ji, W. J. Dual Turn-On/Off Fluorescence Sensing in Heterobimetallic MOFs for Ultrasensitive Detection of Multiple Antibiotics. *Inorg. Chem.* **2025**, *64*, 17266-17278.
